CORRECTION

# Correction: Stochastic Mesocortical Dynamics and Robustness of Working Memory during Delay-Period

Melissa Reneaux, Rahul Gupta, Karmeshu

The following information is missing from the Funding section: The authors received funding from the Department of Science and Technology, India, under the DST PURSE-II grant towards publication charges.

## Reference

1. Reneaux M, Gupta R, Karmeshu (2015) Stochastic Mesocortical Dynamics and Robustness of Working Memory during Delay-Period. PLoS ONE 10(12): e0144378. <https://doi.org/10.1371/journal.pone.0144378> PMID: 26636712

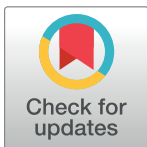

## OPEN ACCESS

**Citation:** Reneaux M, Gupta R, Karmeshu (2018) Correction: Stochastic Mesocortical Dynamics and Robustness of Working Memory during Delay-Period. PLoS ONE 13(10): e0205615. <https://doi.org/10.1371/journal.pone.0205615>

**Published:** October 4, 2018

**Copyright:** © 2018 Reneaux et al. This is an open access article distributed under the terms of the [Creative Commons Attribution License](https://creativecommons.org/licenses/by/4.0/), which permits unrestricted use, distribution, and reproduction in any medium, provided the original author and source are credited.
